# Supplementary material
Source: Springer Nature journal article supplement (https://www.springermedizin.de/resource/supplementary/12913_2013_2684_MOESM4_ESM.docx/9531122)
Supplement: MOESM4 [file 9531122]

**Table 1** Methods and instruments used within the audit system

| **Audit system** | **Methods** | **Instruments** |
| --- | --- | --- |
| Measurements  Feedback of audit findings by presentation and report  Follow-up: revisiting 15 months after the audit to monitor improvements | Studying policy and quality indicators | Online self-assessment tool based on legal, national, and professional practice standards [16] |
| Semi-structured interviews of health care providers | Standardised interview forms [17] |
| Systematic observations (e.g. physicians’ discussions of complications and patient handovers) | Standardised observation forms [17] |
| Questionnaire about team functioning of healthcare providers | Team Climate Inventory [18] |
| Patient record review to measure adverse events | Standardised record review form based on a protocol originally developed by the Harvard Medical Practice  Study [19] |
| Assessment of the quality of medical and nursing patient records | Standardised assessment forms [19, 20] |
| Appraisal of document management (e.g. protocols and procedures) and guideline adherence | Standardised assessment forms partly based on the AGREE instrument [21] |
| Appraisal and assessment of quality of consultation and collaboration by main internal and external partners | Standardised appraisal and assessment questionnaire [22] |
